# Supplementary material for: Inorganic–organic hybrid sorbent for aromatic desulfurization of hydrocarbons: regenerative adsorption based on a charge-transfer complex
Source: Royal Society of Chemistry journal article supplement (doi:10.1039/c6ra17453a), 2016-01-01
Supplement: c6ra17453a1.pdf [file c6ra17453a1.pdf]

## Supporting Information

### **Inorganic-organic hybrid sorbent for aromatic desulfurization of hydrocarbons: Regenerative adsorption based on charge-transfer complex**

Mahsa Armaghan<sup>a</sup>, Mostafa M. Amini<sup>a\*</sup>, Hamid R. Khavasi<sup>a</sup>, Wen-Hua Zhang<sup>c,e</sup>, Siek Weng Ng<sup>d</sup>

<sup>a</sup>*Department of Chemistry, Shahid Beheshti University, G. C., Tehran, 198396311, Iran. E-mail: m-pouramini@sbu.ac.ir; Phone: +89-21-29903109; fax: +89-21-22431663.*

<sup>c</sup>*Institute of Materials Research and Engineering, A\* STAR, 3 Research Link, 117602, Singapore*

<sup>d</sup>*Department of Chemistry, University of Malaya, 50603, Kuala Lumpur, Malaysia*

**Table S1.** X-ray crystallographic data for **2d**

| <b>Parameter</b>                           | <b>2d</b>                                            |
|--------------------------------------------|------------------------------------------------------|
| Empirical formula                          | C <sub>20</sub> H <sub>22</sub> ClNO <sub>5</sub> Si |
| Formula weight                             | 419.93                                               |
| Crystal size (mm)                          | 0.30 × 0.20 × 0.01                                   |
| Crystal color                              | Red/Plate                                            |
| Temperature (K)                            | 100(2)                                               |
| Wavelength (Å)                             | 0.71073                                              |
| Crystal system                             | monoclinic                                           |
| Space group                                | <i>P</i> 2 <sub>1</sub> / <i>c</i>                   |
| <i>a</i> (Å)                               | 7.145(5)                                             |
| <i>b</i> (Å)                               | 35.461(16)                                           |
| <i>c</i> (Å)                               | 10.506(7)                                            |
| <i>α</i> (°)                               | 90.00                                                |
| <i>β</i> (°)                               | 133.00(11)                                           |
| <i>γ</i> (°)                               | 90.00                                                |
| <i>v</i> (Å <sup>3</sup> )                 | 1947(2)                                              |
| <i>Z</i>                                   | 4                                                    |
| Absorption coefficient (mm <sup>-1</sup> ) | 0.290                                                |
| Calculated density (mg/m <sup>3</sup> )    | 1.433                                                |
| F(000)                                     | 880                                                  |
| θ Range for data                           | 2.89–25.00                                           |
| Reflections collected                      | 16740                                                |
| Unique reflections [R(int)]                | 0.1717                                               |
| Data/restraints/parameters                 | 3434/126/254                                         |
| Goodness-of-fit on F <sup>2</sup>          | 1.111                                                |
| Final R indices [I>2σ(I)]                  | R1 = 0.1825 wR2 = 0.4127                             |

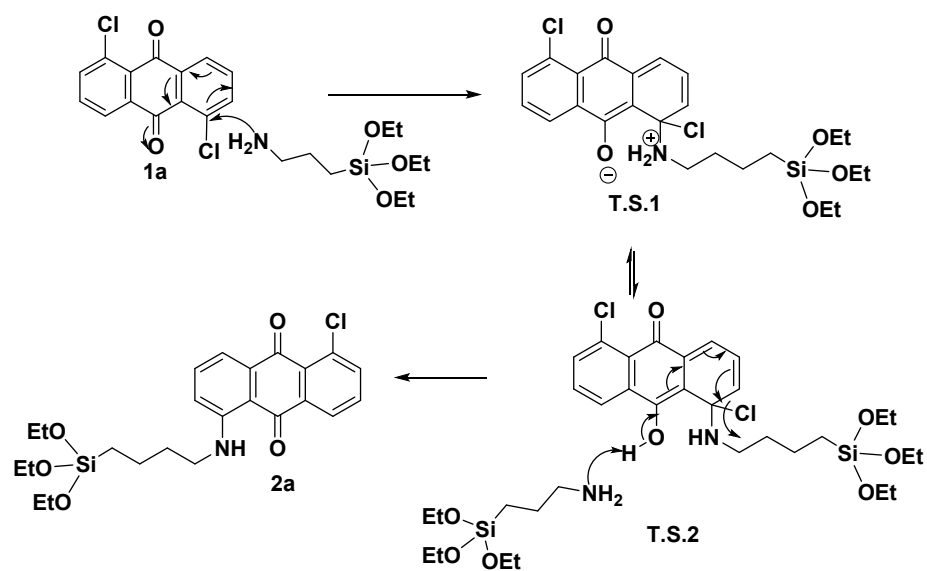

**Scheme S1.** The possible mechanism for functionalization of 1-chloro-5-((3-(triethoxysilyl)propyl)amino)anthracene-9,10-dione (**2a**, AQ-Cl).

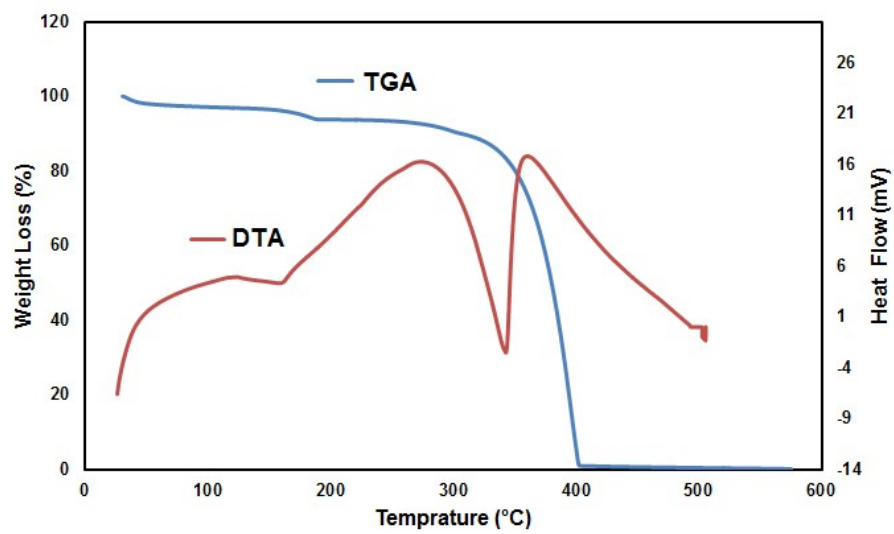

**Figure S1.** TGA and DTA curves of 1,5-dichloro-4,8-dinitroanthraquinone (**1c**).

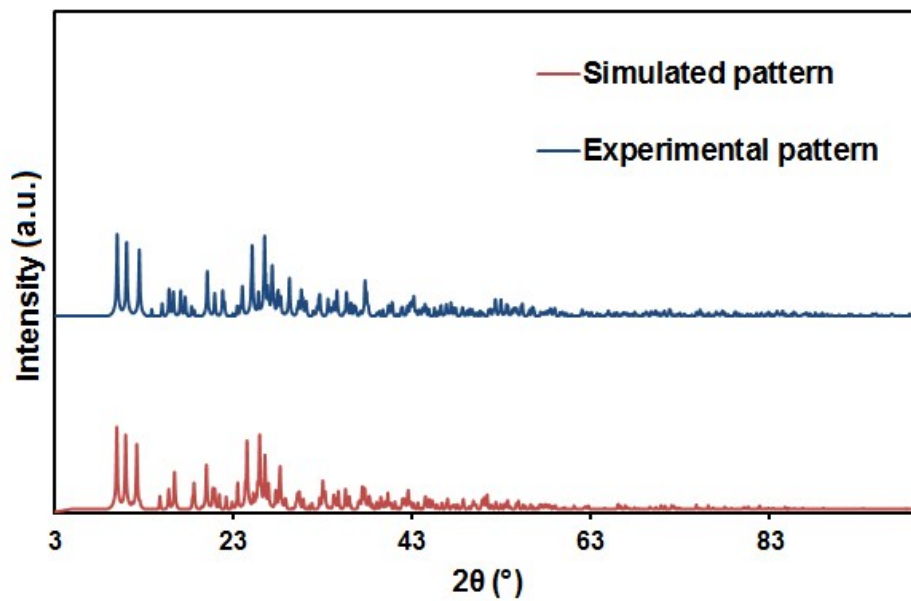

**Figure S2.** Experimental (blue) and simulated (red) powder X-ray diffraction pattern (PXRD) for the charge-transfer complex.

**Table S2.** X-ray Crystallographic data for CTC

| <b>Parameter</b>                           | <b>CTC</b>                                                                      |
|--------------------------------------------|---------------------------------------------------------------------------------|
| Empirical formula                          | C <sub>28</sub> H <sub>16</sub> C <sub>12</sub> N <sub>2</sub> O <sub>6</sub> S |
| Formula weight                             | 579.40                                                                          |
| Crystal size (mm)                          | 0.35 × 0.20 × 0.10                                                              |
| Crystal color                              | Orange/needle                                                                   |
| Temperature (K)                            | 298(2)                                                                          |
| Wavelength (Å)                             | 0.71073                                                                         |
| Crystal system                             | Orthorhombic                                                                    |
| Space group                                | <i>P cnb</i>                                                                    |
| <i>a</i> (Å)                               | 10.6317(8)                                                                      |
| <i>b</i> (Å)                               | 14.5110(10)                                                                     |
| <i>c</i> (Å)                               | 16.1526(9)                                                                      |
| $\alpha$ (°)                               | 90.00                                                                           |
| $\beta$ (°)                                | 90.00                                                                           |
| $\gamma$ (°)                               | 90.00                                                                           |
| <i>v</i> (Å <sup>3</sup> )                 | 2492.0(3)                                                                       |
| <i>Z</i>                                   | 4                                                                               |
| Absorption coefficient (mm <sup>-1</sup> ) | 0.394                                                                           |
| Calculated density (mg/m <sup>3</sup> )    | 1.544                                                                           |
| F(000)                                     | 1184                                                                            |
| $\theta$ Range for data                    | 2.29 – 29.19                                                                    |
| Reflections collected                      | 11048                                                                           |
| Unique reflections [R(int)]                | 0.0569                                                                          |
| Data/restraints/parameters                 | 3355/0/177                                                                      |
| Goodness-of-fit on F <sup>2</sup>          | 0.979                                                                           |
| Final R indices [I > 2 $\sigma$ (I)]       | R1 = 0.0610 wR2 = 0.1423                                                        |

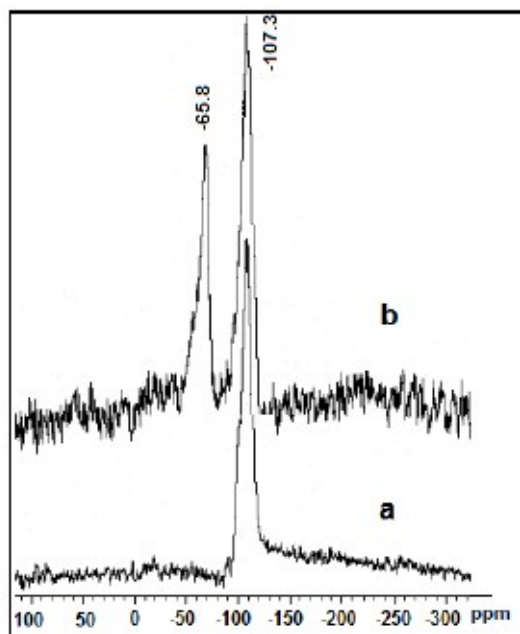

**Figure S3.**  $^{29}\text{Si}$  CP/MAS NMR spectra of a) Si-MCM-41, and, b) AQ-NO<sub>2</sub>@Si-MCM-41.

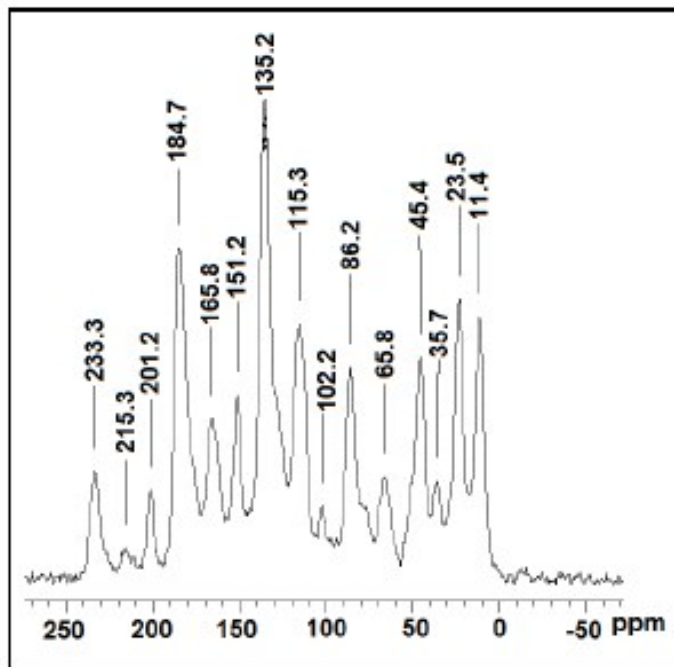

**Figure S4.**  $^{13}\text{C}$  CP/MAS NMR spectrum of AQ-NO<sub>2</sub>@Si-MCM-41.



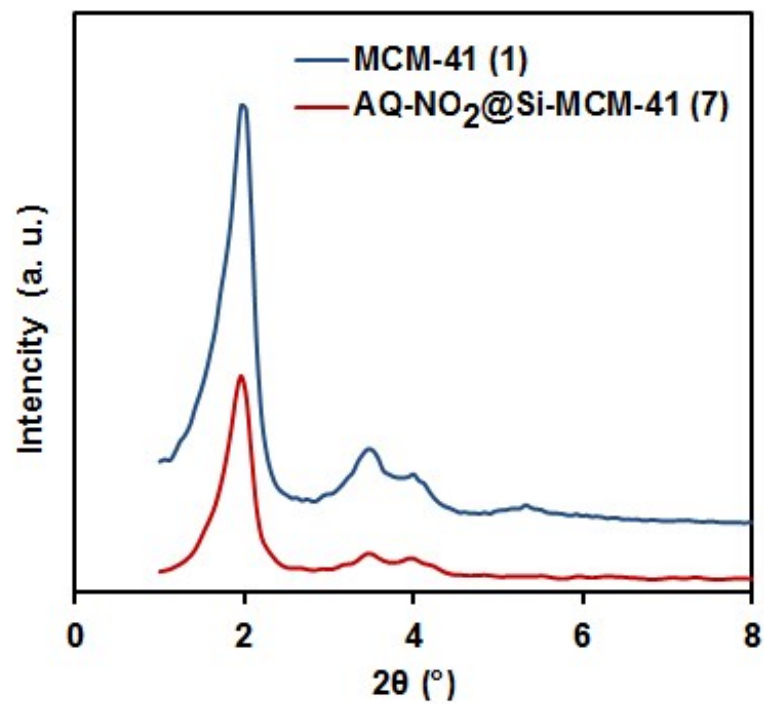

**Figure S5.** X-ray diffraction patterns of Si-MCM-41 and AQ-NO<sub>2</sub>@Si-MCM-41.

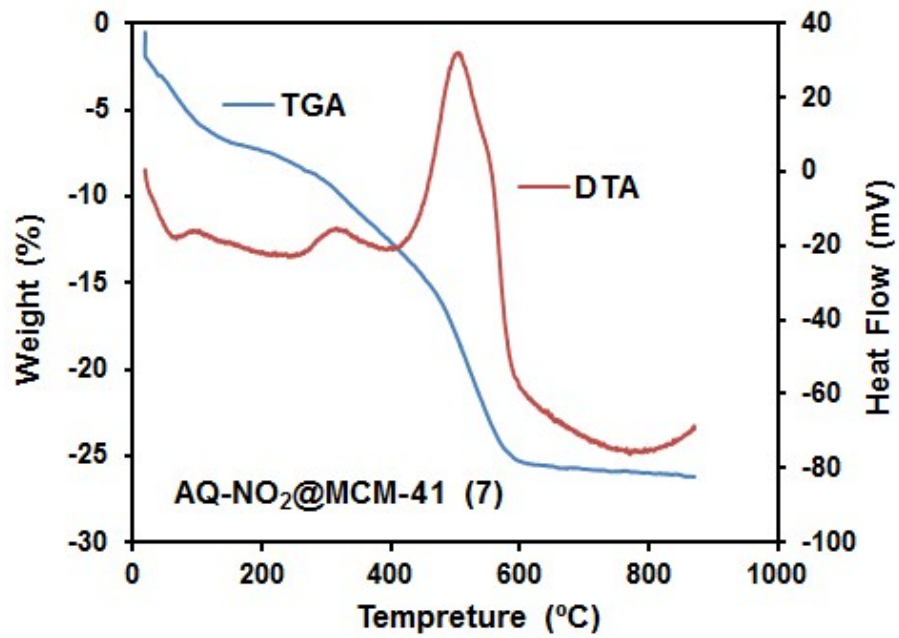

Figure S6. TGA-DTA curves of AQ-NO<sub>2</sub>@Si-MCM-41.

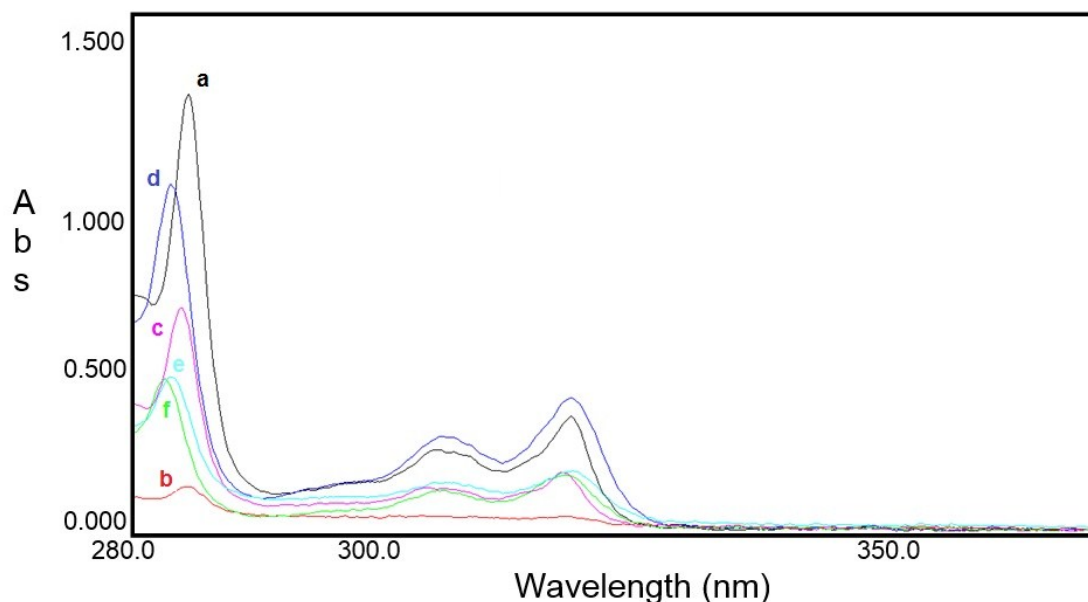

**Figure S7.** UV-Vis spectrum of DBT before adsorption (a), after adsorption on AQ-NO<sub>2</sub>@Si-MCM-41 (9, 7) (b) (c), DBT before adsorption (d), and after adsorption on AQ-NO<sub>2</sub>@Si-MCM-41 (10, 8) (e) (f).

Figure S7 shows the UV-Vis absorption spectrum of a DBT and 4,6-DMDBT solution with an initial concentration of 20 mg/L (0.10 mM) before and after contact with the AQ-NO<sub>2</sub>@Si-MCM-48 at different conditions. The intensities of the distinct peak of DBT and 4,6-DMDBT at 286 and at 284 nm respectively dropped significantly in the UV-Vis spectrum of the 4,6-DMDBT solution after contact with sorbent.

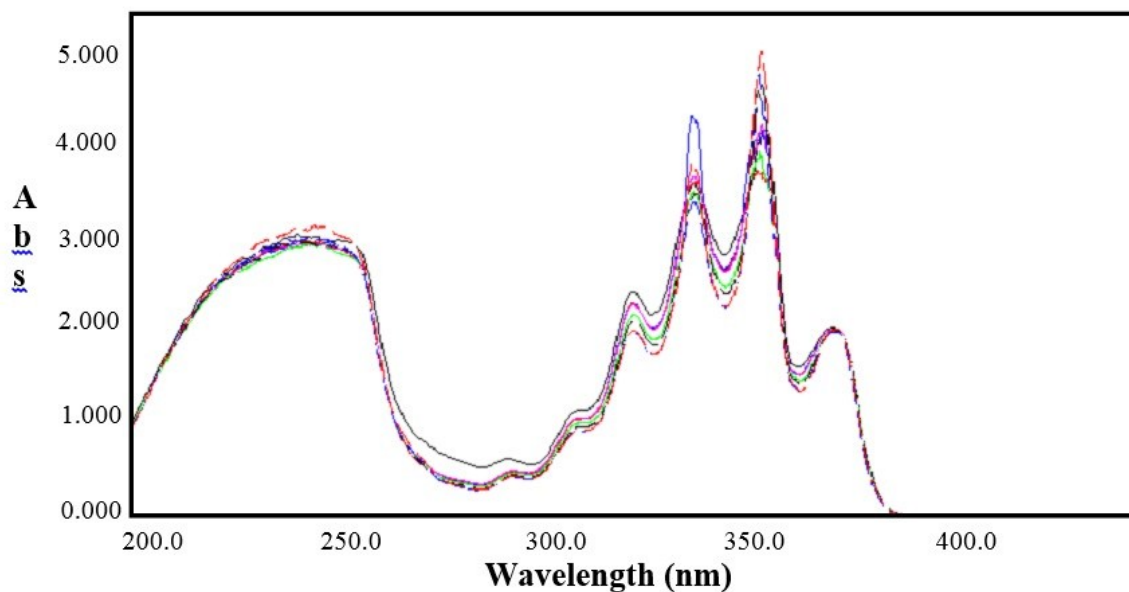

**Figure S8.** UV-Vis spectrum of anthracene before and after contact with AQ-NO<sub>2</sub>@Si-MCM-41 for two days at room temperature.

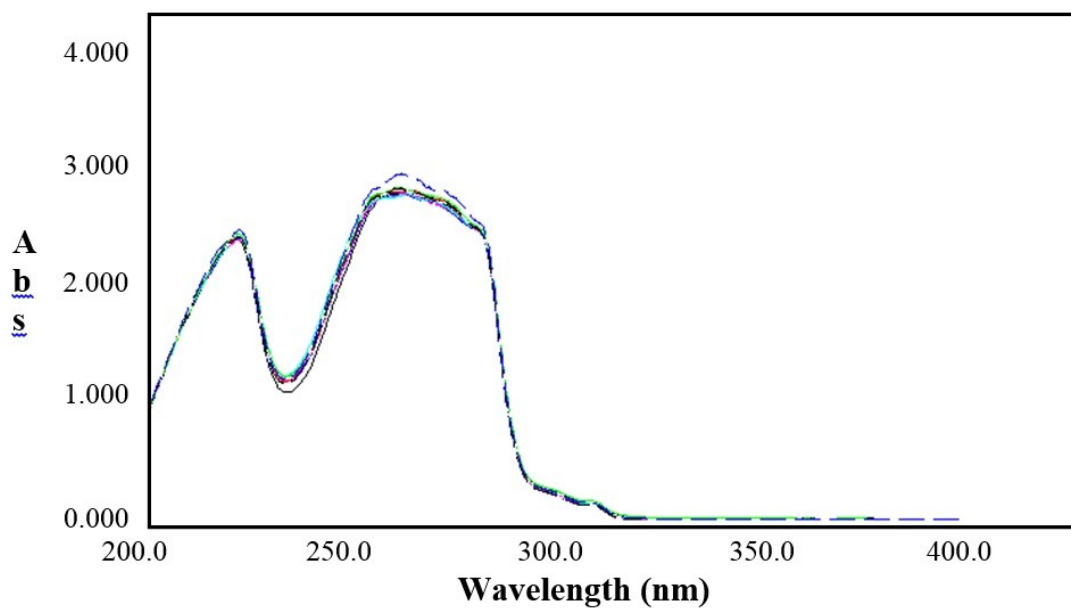

**Figure S9.** UV-Vis spectrum of naphthalene before and after contact with AQ-NO<sub>2</sub>@Si-MCM-41.

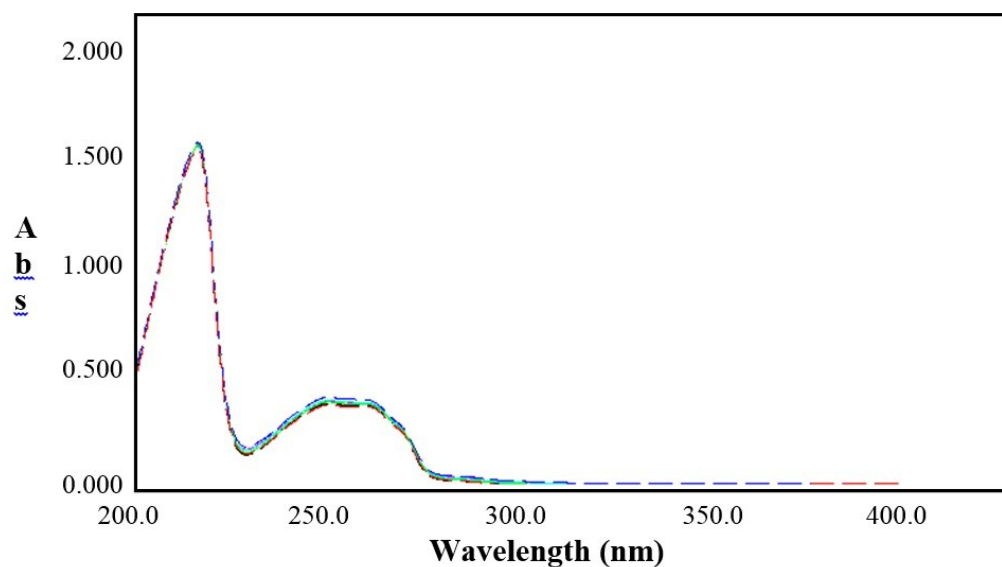

**Figure S10.** UV-Vis spectrum of xylene before and after contact with AQ-NO<sub>2</sub>@Si-MCM-41.

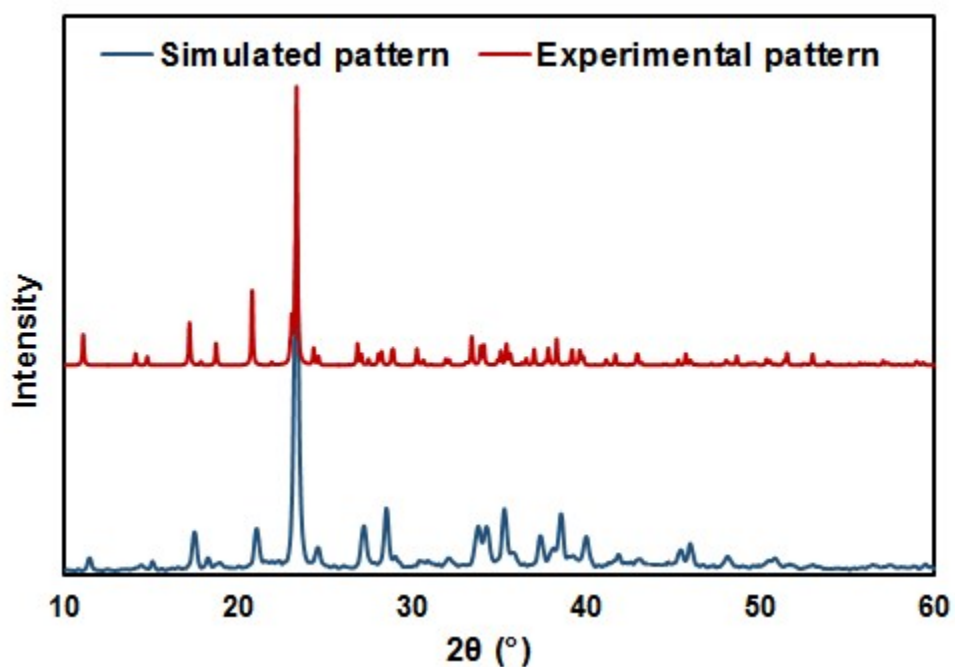

**Figure S11.** Simulated (red) and experimental (blue) powder X-ray diffraction pattern (PXRD) of 1,5-dichloro-4,8-dinitroanthraquinone (**1c**) generated after heating CTC to 200 °C under reduced pressure.
